# Supplementary material for: Functional characterization of a constitutively active kinase variant of Arabidopsis phototropin 1
Source: PubMed Central journal article supplement (PMC5566536; doi:10.1074/jbc.m117.799643), 2017-06-29
Supplement: 10.1074_M117.799643_jbc.M117.799643-1.pdf [file 10.1074_M117.799643_jbc.M117.799643-1.pdf]

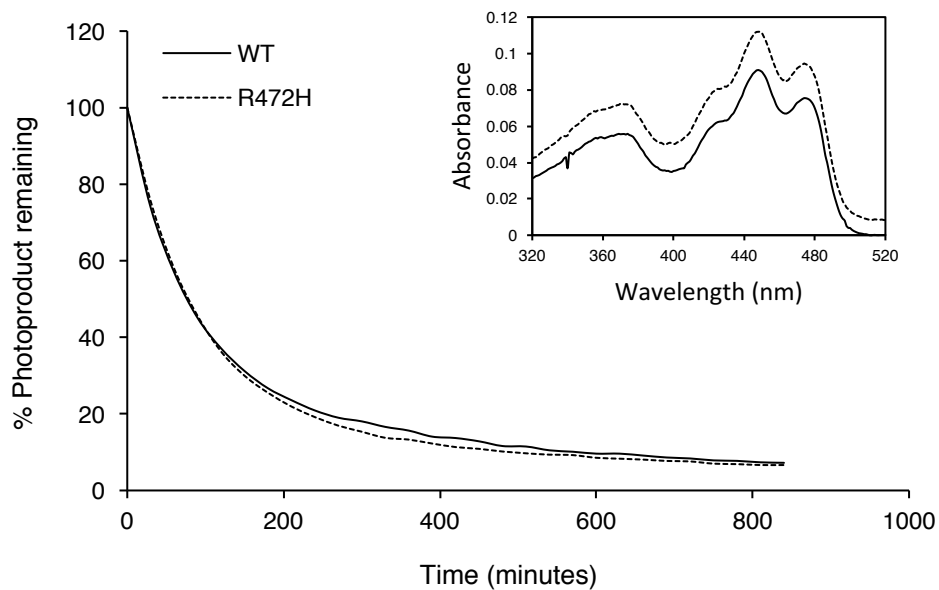

**Figure S1.** Impact of the R472H mutation on the photochemical properties of phot1 LOV1+2. Dark-recovery kinetics for phot1 LOV1+2 wild-type (WT, solid line) and phot1 LOV1+2 R472H (dashed line). Purified protein was irradiated with a white-light camera strobe flash and the recovery recorded at an absorbance of 450 nm. Recovery is expressed as percentage photoproduct remaining and was calculated from the ratio of absorbance at 450 nm obtained immediately after the light treatment to that obtained for subsequent sampling in darkness. Dark-state absorption spectra for the WT and mutant proteins are shown in the inset.

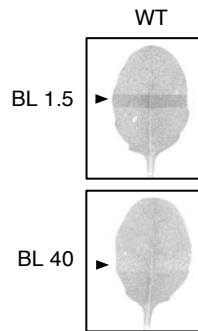

**Figure S2.** Slit band assays for chloroplast movement responses in leaves from wild-type plants. Detached rosette leaves were placed on agar plates and irradiated with blue light at  $1.5 \mu\text{mol m}^{-2} \text{s}^{-1}$  (BL 1.5) or  $40 \mu\text{mol m}^{-2} \text{s}^{-1}$  (BL 40) through a 1 mm slit for 1 h. Arrowheads indicate the irradiated areas.

| Name                                 | Nucleotide Sequence                                     |
|--------------------------------------|---------------------------------------------------------|
| phot1 R472H F                        | CTAGCTACTACACTCGAACATATCGAGAAGAATTTTCGTC                |
| phot1 R472H R                        | GACGAAATTCTTCTCGATATGTTTCGAGTGTAGTAGCTAG                |
| phot1 C234A F                        | CAAAGAAGTCGTCGGCAGAAACGCCCGATTTCACAAGGAT                |
| phot1 C234A R                        | ATCCTTGTA AAAATCGGGCGTTTCTGCCGACGACTTCTTTG              |
| phot1 C512A F                        | TAGCCGTGAAGAAATTCTTGAAGAAATGCCAGTTTCTACAAG<br>G         |
| phot1 C512A R                        | CCTTGTAGAAACCTGGCATTCTTCCAAGAATTTCTTCACGGCTA            |
| GA pEZ phot1 <i>Sall</i>             | AAGATCTAAAAGATGCGTTGTTCGACGTTTCAACAAACGTTTGTG           |
| GA pEZ phot1 <i>BamHI</i>            | AGCGGCAGCGGCAGCAGCCGGATCCGCAAAAACATTTGTTTGC<br>AGATCTTC |
| GA pHS A'α-LOV2-Ja WT <i>NcoI</i>    | AACAGATTGGAGGTGCAACTACACTCGAACGTATCGAG                  |
| GA pHS A'α-LOV2-Ja R472H <i>NcoI</i> | AACAGATTGGAGGTGCAACTACACTCGAACATATCGAG                  |
| GA pHS A'α-LOV2-Ja <i>NotI</i>       | TCAGTGGTGGTGGTGGTGGTGCTCGAGTGCTTAGTGGTTTGCC<br>CATAAATC |
| q-PHOT1 F                            | ATGCCAACATGACACCAGAG                                    |
| q-PHOT1 R                            | CCATGGTGGTGAATCTTTCC                                    |
| q-ISU1 F                             | GCCATCGCTTCTTCATCTGTTGC                                 |
| q-ISU1 R                             | TGGGAGAGAAAGATGCTTTGCG                                  |

**Table S1.** Primers used in this study for mutagenesis, Gibson assembly and qRT-PCR.
